# Supplementary material
Source: PubMed Central journal article supplement (PMC1896282)
Supplement: bj4040517add.pdf [file bj4040517add.pdf]

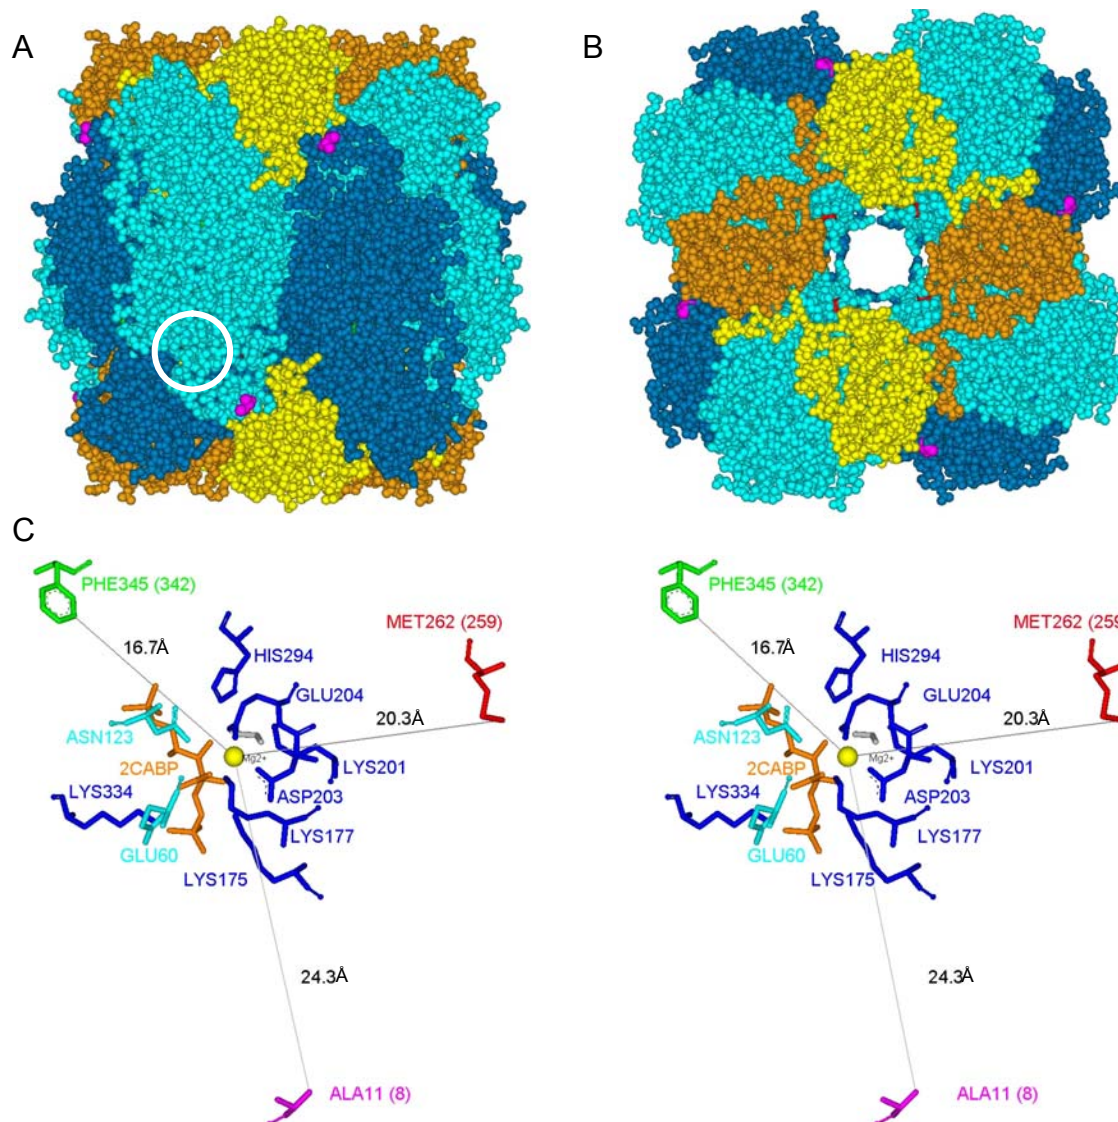

**Supplementary Figure 1.** The structure of L<sub>8</sub>S<sub>8</sub> Rubisco. (A) Arrangement of the eight large (L, light and dark blue) and eight small (S, yellow and orange) subunits in the *Synechococcus* PCC6301 Rubisco hexadecamer viewed down the twofold and (B) fourfold axes (Protein Data Bank code 1RBL; [1]). (C) Stereo view of the positioning of the L subunit mutations Ala-8-Ser (pink), Met-259-Thr (red) and Phe-342-Ser (green) relative to the bound substrate intermediate analogue 2-carboxyarabinitol-P<sub>2</sub> (2CABP, orange) and key conserved residues in a CO<sub>2</sub>-Mg<sup>2+</sup> ‘activated’ (CO<sub>2</sub> carbamate moiety in grey, bound Mg<sup>2+</sup> in yellow) active site that is formed at the interface between the C-terminal domain of one L (dark blue) and the N-terminal residues of its paired L (light blue). The distance from the closest carbon atom in each mutation to the Mg<sup>2+</sup> is shown. The relative position of the active site to the structure in panel A is indicated by a

white circle. The mutated L residues are uniformly colored in each panel (Phe-342 is not a surface residue and is not visible in panel A or B). Residue numbering is relative to spinach Rubisco L.

- 1 Newman, J. and Gutteridge, S. (1993) The X-ray structure of *Synechococcus* ribulose-bisphosphate carboxylase/oxygenase-activated quaternary complex at 2.2- Å resolution. J. Biol. Chem. **268**, 25876-25886

|                                         | 250       |     | 266       |
|-----------------------------------------|-----------|-----|-----------|
|                                         |           |     |           |
| <i>Synechococcus</i> PCC6301-           | RAEFAKELG | M   | PIIMHDFLT |
| <i>Synechocystis</i> PCC6803-           |           | I T |           |
| <i>Gleobacter violaceus</i> PCC7421-    |           | K T | Y         |
| <i>Crocospaera watsonii</i> WH8501-     |           | I T | V I       |
| <i>Trichodesmium erythraeum</i> IMS101- |           | T   |           |
| <i>Anabaena variabilis</i> ATCC29423-   | Y         | N Q | Y         |
| <i>Anabaena</i> sp PCC7120-             | Y         | --Q | Y         |
| <i>Nostoc punctiforma</i> PCC73102-     | Y         | K Q | Y         |
| <i>Synechococcus</i> sp CC9902-         |           | N Q |           |
| <i>Synechococcus</i> sp CC9605-         |           |     | I         |
| <i>Synechococcus</i> sp PCC7942-        |           |     |           |
| <i>Synechococcus</i> sp WH8102-         |           |     | I         |
| <i>Thermosynechococcus</i> sp BP-1-     |           | E   |           |
| (9x) <i>Prochlorococcus marinus</i> -   |           | D   | YI        |

**Supplemental Figure 2.** Cyanobacterial L subunit comparison. Amino acids residues 250 to 266 in the *Synechococcus* PCC6301 Rubisco large subunit (PCC6301, GenBank Acc No. (GB) AP008231.1) compared with cyanobacterial Rubisco sequences containing threonine (T) or glutamine (Q) at the equivalent Met-259 codon (in red). The cyanobacterial genome sequences were obtained from the NCBI (<http://www.ncbi.nlm.nih.gov/genomes/lproks.cgi>) and JGI ([http://genome.jgi-psf.org/mic\\_home.html](http://genome.jgi-psf.org/mic_home.html)) genome databases. Dashes are included to optimize the alignment. The sequences were aligned by the Clustal V method and only residues differing from the PCC6301 sequence are shown. PCC6803, (GB: [BA000022](#)); PCC7421, (GB: [BA000045](#)); WH8501, (JGI: [400856410](#)); IMS101, (JGI: [403238160](#)); ATCC29423, (GB: [CP000117](#)); PCC7120, (GB: [BA000019](#)); PCC73102 (GB: [NZ\\_AAAY02000040](#)); CC9902, (GB: [CP000097](#)); CC9605, (GB: [CP000435](#)); PCC7942, (GB: [CP000100](#)); PCC8102, (GB: [BX548020](#)); BP-1 (GB: [BA000039](#)); *P. marinus* (9 strains, GB: [CP000095](#) (str. NATL2A), [CP000111](#) (str. MIT 9312), [CP000551](#) (str. AS9601), [CP000552](#) (str. MIT 9515), [CP000553](#) (str. NATL1A), [CP000554](#) (str. MIT 9303), [AE017126](#) (str. CCMP1375), [BX548174](#) (str. MED4) and [BX548175](#) (str. MIT9313)).
